# Supplementary material
Source: publisher figshare collection journal article supplement (https://acs.figshare.com/ndownloader/files/4024768)
Supplement: Supplementary file 1 [file 4024768]

**Identification of metabolic pathways in *Daphnia magna* explaining  
hormetic effects of selective serotonin reuptake inhibitors and 4-  
nonylphenol using transcriptomic and phenotypic responses.**

Bruno Campos<sup>1</sup>, Natàlia Garcia-Reyero<sup>2</sup>, Claudia Rivetti<sup>1</sup>, Lynn Escalon<sup>3</sup>, Tanwir  
Habib<sup>4</sup>, Romà Tauler<sup>1</sup>, Stefan Tsakovski<sup>5</sup>, Benjamín Piña<sup>1</sup>, Carlos Barata<sup>1\*</sup>.

<sup>1</sup>Institute of Environmental Assessment and Water Research (IDÆA-CSIC), Jordi  
Girona 18, 08034, Barcelona, Spain.

<sup>2</sup>Institute for Genomics, Biocomputing and Biotechnology, Mississippi State University,  
Starkville, MS 39759, USA

<sup>3</sup>U.S. Army Engineer Research and Development Center, Environmental Laboratory  
3909 Halls Ferry Road, Vicksburg, MS 39180, USA

<sup>4</sup>Badger Technical Services, 12500 San Pedro Avenue, Suite 450, San Antonio, TX  
78216, USA

<sup>5</sup>Department of Analytical Chemistry, Faculty of Chemistry, Sofia University, James  
Bourchier Blvd, 1164 Sofia, Bulgaria

\*Address correspondence to Carlos Barata, Institute of Environmental Assessment  
and Water Research (IDAEA-CSIC), Jordi Girona 18, 08034 Barcelona, Spain.  
Telephone: +34-93-4006100. Fax: +34-93-2045904. E-mail: cbmqam@cid.csic.es

|    |                                                  |    |
|----|--------------------------------------------------|----|
| 24 | <i>Table of content</i>                          |    |
| 25 | Methods                                          |    |
| 26 | Chemicals.....                                   | S3 |
| 27 | Experimental animals .....                       | S3 |
| 28 | Experiment 2 .....                               | S3 |
| 29 | Validation of Microarray results by RT-qPCR..... | S4 |
| 30 | Figures and Figure Legends                       |    |
| 31 | Figure S1 .....                                  | S5 |
| 32 | Figure S2.....                                   | S6 |
| 33 | Figure S3.....                                   | S7 |
| 34 | Figure S4.....                                   | S8 |
| 35 | References.....                                  | S8 |
| 36 |                                                  |    |
| 37 |                                                  |    |

## 38    **METHODS**

### 39    **Chemicals**

40    4-nonylphenol (CAS No 104-40-5, PESTANAL<sup>®</sup> analytical grade standard, 98.4%  
41    purity, Riedel-de-Haen, Germany); fluoxetine hydrochloride (CAS-No 56296-78-7;  
42    analytical standard, purity 100%) Sigma-Aldrich, USA), and fluvoxamine maleate  
43    (CAS-No 61718-82-9, analytical standard, purity 100%) were purchased from Sigma-  
44    Aldrich (USA/Netherlands). All other chemicals were analytical grade and were  
45    obtained from Merck (Germany).

46    **Experimental animals.** Individual or bulk cultures of 10 animals/L were maintained in  
47    ASTM hard synthetic water as described in Barata and Baird <sup>1</sup>. Individual or bulk  
48    cultures were fed daily with *Chorella vulgaris* Beijerinck (5x10<sup>5</sup> cells/mL, respectively,  
49    corresponding to 1.8 µg C/mL). *C. vulgaris* was grown axenically in Jaworski/Euglena  
50    gracilis 1: 1 medium (CCAP, 1989). The culture medium was changed every day, and  
51    neonates were removed within 24 h. Photoperiod was set to 14h light: 10h dark cycle  
52    and temperature at 20 ± 1°C.

53    **Experiment 2:** Ten gravid females were separately exposed to the same concentrations  
54    of 4-nonylphenol (20, 60 µg/L), fluvoxamine (7 µg/L) and fluoxetine (40 µg/L)  
55    described in experiment 1 using a food ration of 5 x 10<sup>5</sup> cells/mL of *C. vulgaris*.  
56    Likewise in experiment 1 all contaminants were dosed in the carrier acetone (0.1 mL/L)  
57    and a solvent control treatments of acetone (0.1 mL/L) was also included for baseline  
58    comparison of transcriptomic responses. Experiments started with 8-9 day old gravid  
59    females, which were exposed during three consecutive broods to the studied chemicals  
60    (10-14 days). Cultures of 100 to 150 individuals (< 24 h old neonates) were initiated  
61    and maintained in bulk cultures as described above. Within 24 h of deposition of the  
62    first clutch into the brood chamber, single females were removed and randomly

63 assigned to each treatment. The first batch of neonates (hatching within the first 48-72  
64 h) was always discarded and not evaluated, as these animals were not exposed to the  
65 tested chemicals during their entire developmental period. Thus, only neonates from the  
66 second, third and fourth broods were counted for assessing effects on total offspring  
67 production. Just after releasing their fourth clutch into the brood pouch, eggs were  
68 gently flushed from the brood pouch and females were immediately flash- frozen in  
69 liquid N<sub>2</sub> and preserved at -80 °C until RNA extraction. This protocol, by using only  
70 de-brooded females excludes the contribution of developing embryos on transcriptomic  
71 responses. Furthermore, the use of de-brooded adults in the first hours of their intermolt  
72 instar ensured measurement of transcriptomic responses of all the studied females at the  
73 beginning of the intermolt cycle, thus minimizing undesirable variation of gene  
74 transcription patterns within females across the molt cycle <sup>3</sup>.

#### 75 **Validation of Microarray results by qRT-PCR**

76 Quantities of 1 µg were retrotranscribed to cDNA using First Strand cDNA Synthesis  
77 Kit Roche<sup>®</sup> (Germany) and stored at -20°C. Aliquots of 10ng were used to quantify  
78 specific transcripts in Lightcycler<sup>®</sup> 480 Real Time PCR System (Roche, Germany)  
79 using Lightcycler 480 SYBR Green I Master<sup>®</sup> (Roche, Germany). Relative abundance  
80 values of all genes were calculated from the second derivative of their respective  
81 amplification curve, Cp values calculated by technical triplicates. Cp values of target  
82 genes were compared to the corresponding reference gene <sup>4</sup>.

83

84 **FIGURES AND FIGURE LEGENDS**  
85

86  
87  
88  
89  
90

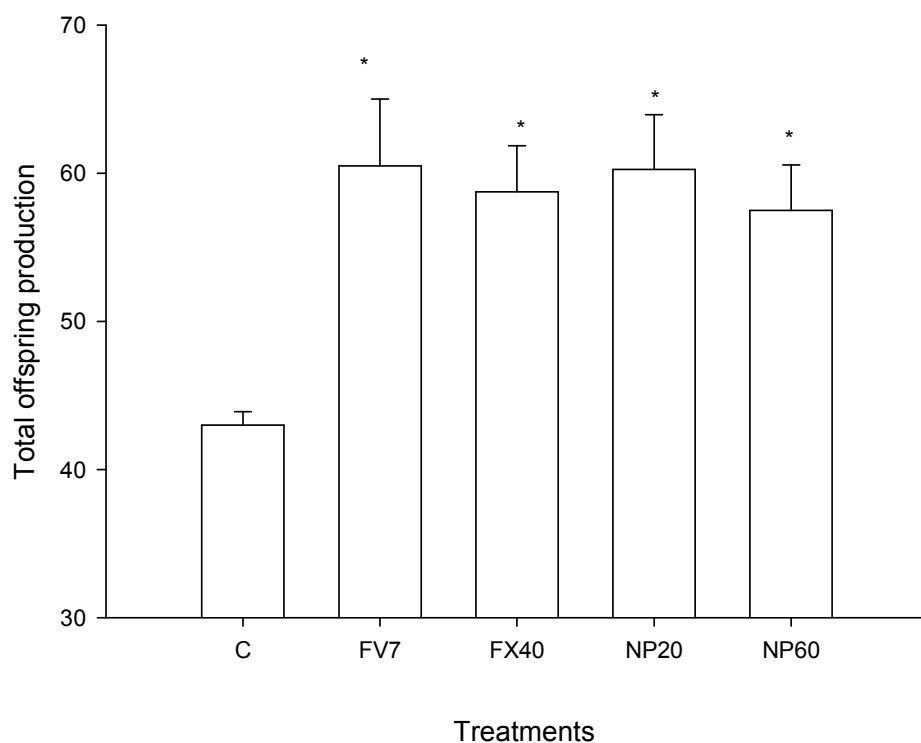

91  
92  
93  
94  
95  
96  
97  
98

Fig S1. Total offspring production (Mean SE, N=4) of the four selected females exposed to the studied SSRI and 4-nonylphenol treatments. C, FV10, FX40, N20, N60 are solvent control, fluvoxamine at 7  $\mu$ /L, fluoxetine at 40  $\mu$ /L, 4-nonylphenol at 20  $\mu$ /L and 60  $\mu$ /L, respectively. Asterisks indicate significant differences from solvent controls following ANOVA and Dunnett's comparison tests.

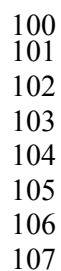

Fig S2. Heat map and hierarchical clustering (Pearson correlation) base on log2-ratios of the differentially transcribed genes in *Daphnia magna* juveniles across the experimental replicates for the SSRI (FV, FX) and nonylphenol (N20, N60) treatments. The four replicates are identify as A,B,C,D. Gene transcripts in red and green are up and down regulated and those in black unchanged. Colour scale spans from -2.5 to 2.5.

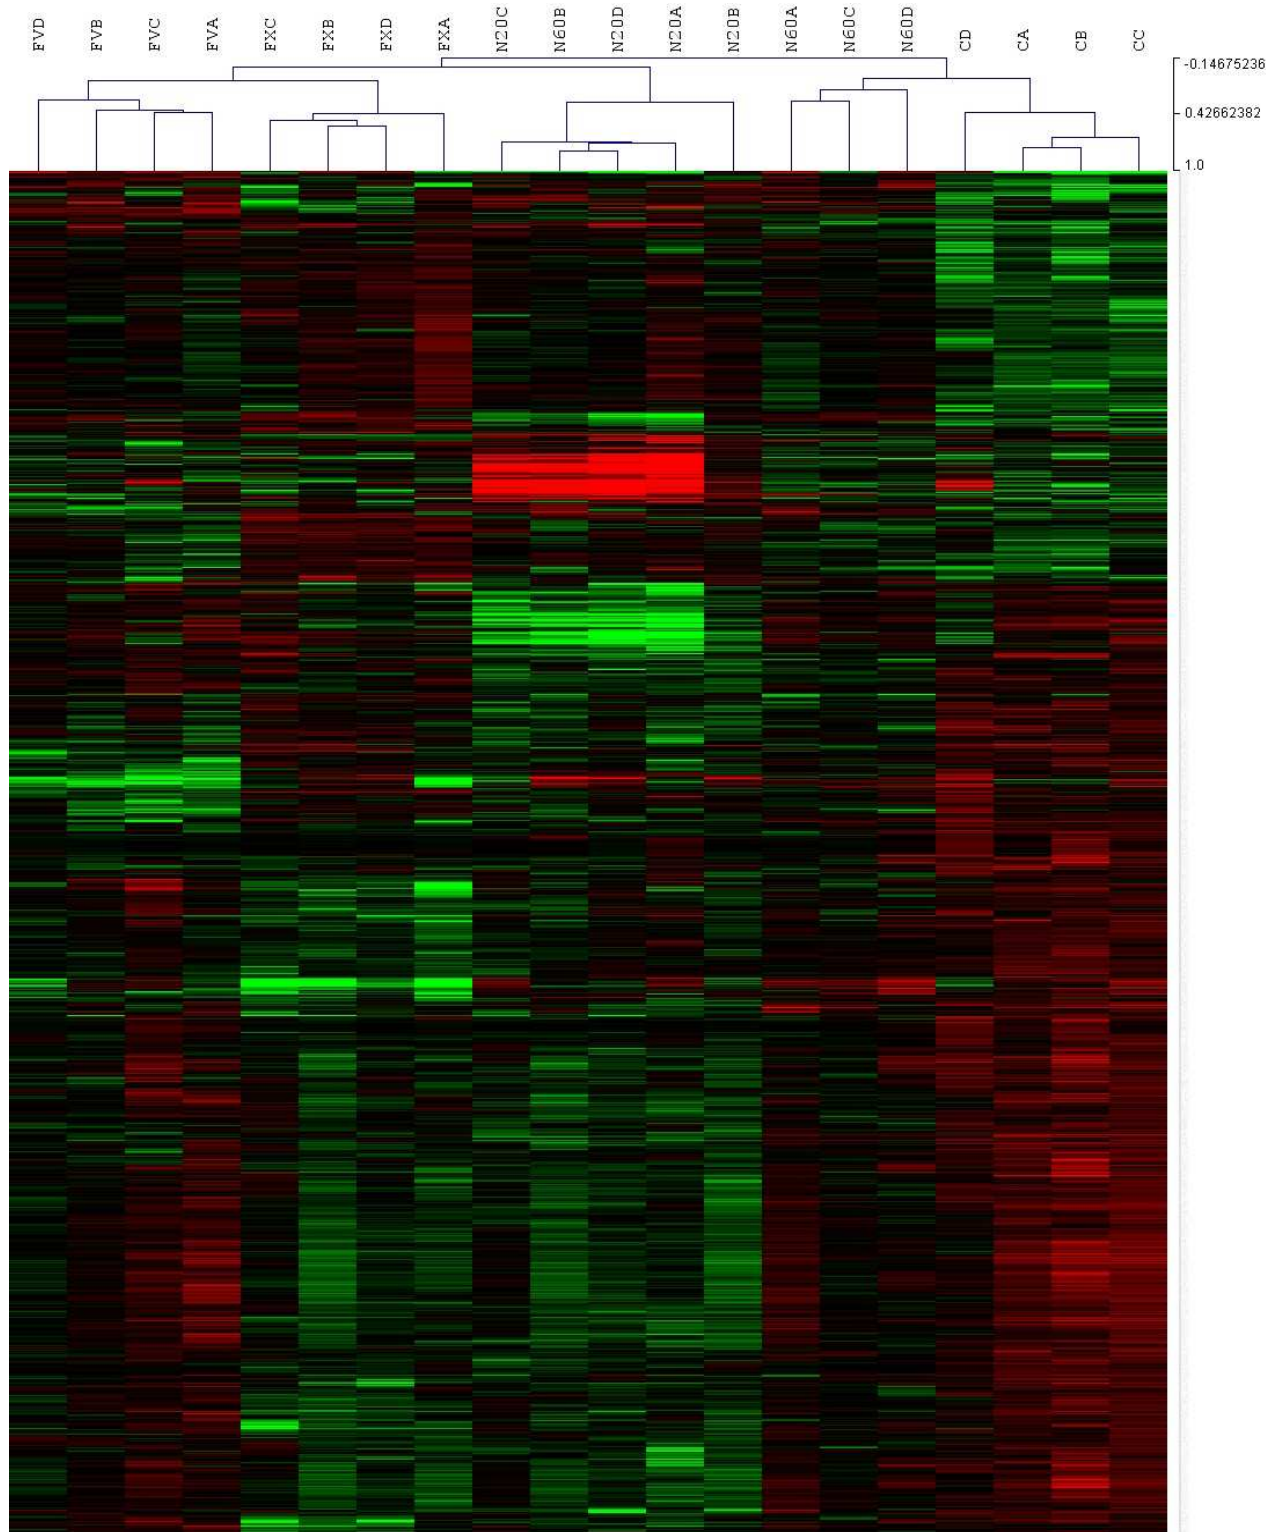

Fig S3. Heat map and hierarchical clustering (Pearson correlation) base on log2-ratios of the differentially transcribed genes in *Daphnia magna* adults across the experimental replicates for the SSRIs (FV, FX) and nonylphenol (N20, N60) treatments. The four replicates are identify as A,B,C,D. Gene transcripts in red and green are up and down regulated and those in black unchanged. Colour scale spans from -2.5 to 2.5.

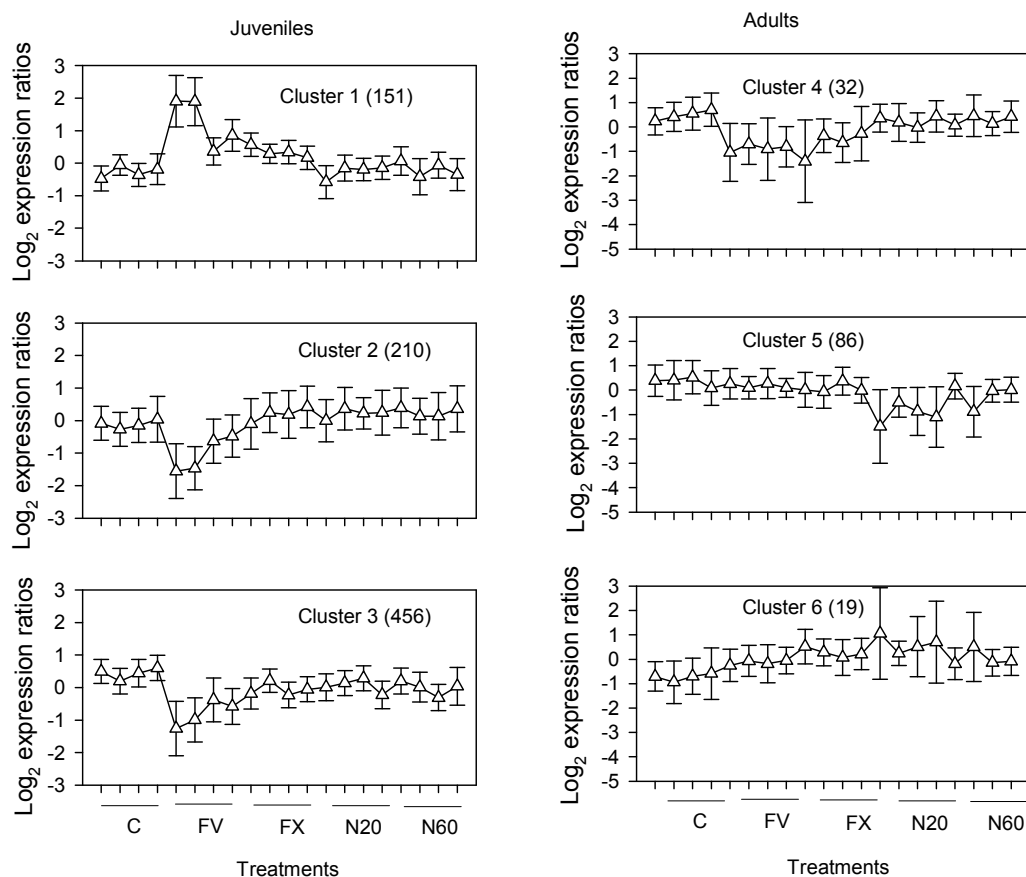

Fig S4. Self Organizing Maps (SOM) of gene transcription responses of juveniles and adults across the experimental replicates for SSRIs (fluvoxamine, FV; fluoxetine, FX) and 4-nonylphenol (N20, N60) treatments. Results are depicted as Mean  $\pm$  SD of log<sub>2</sub>-ratios. Number of de-regulated genes are depicted between parenthesis.

## REFERENCES

- Barata, C.; Baird, D. J., Determining the ecotoxicological mode of action of toxicants from measurements on individuals: results from short duration chronic tests with *Daphnia magna* Straus. *Aquatic toxicology* **2000**, *48*, 195-209.
- Campos, B.; Piña, B.; Carlos, B. C., Mechanisms of action of selective serotonin reuptake inhibitors in *Daphnia magna*. *Environmental Science and Technology* **2012**, *46*, (5), 2943-2950.
- Piña, B.; Barata, C., A genomic and ecotoxicological perspective of DNA array studies in aquatic environmental risk assessment. *Aquatic Toxicology* **2011**, *105*, (3-4 SUPPL.), 40-49.
- Pfaffl, M., A new mathematical model for relative quantification in real-time RT-PCR. *Nucl. Acids Res.* **2001**, *29*, e45.
- Saeed, A. I.; Sharov, V.; White, J.; Li, J.; Liang, W.; Bhagabati, N.; Braisted, J.; Klapa, M.; Currier, T.; Thiagarajan, M.; Sturn, A.; Snuffin, M.; Rezantsev, A.; Popov, D.; Ryltsov, A.; Kostukovich, E.; Borisovsky, I.; Liu, Z.; Vinsavich, A.; Trush, V.;



139 Quackenbush, J., TM4: a free, open-source system for microarray data management and  
 140 analysis. *Biotechniques* **2003**, 34, (2), 374-8.

141 6. Rajalahti, T.; Arneberg, R.; Berven, F. S.; Myhr, K. M.; Ulvik, R. J.; Kvalheim,  
 142 O. M., Biomarker discovery in mass spectral profiles by means of selectivity ratio plot.  
 143 *Chemometrics and Intelligent Laboratory Systems* **2009**, 95, (1), 35-48.

144 7. Dom, N.; Vergauwen, L.; Vandenbrouck, T.; Jansen, M.; Blust, R.; Knapen, D.,  
 145 Physiological and molecular effect assessment versus physico-chemistry based mode of  
 146 action schemes: *Daphnia magna* exposed to narcotics and polar narcotics.  
 147 *Environmental Science and Technology* **2012**, 46, (1), 10-18.

148 8. Wold, S.; Sjöström, M.; Eriksson, L., PLS-regression: A basic tool of  
 149 chemometrics. *Chemometrics and Intelligent Laboratory Systems* **2001**, 58, (2), 109-  
 150 130.

151

152
